# Supplementary material
Source: publisher site journal article supplement (https://www.dovepress.com/article/408523)

**Supplementary figure 1 A**. Amplitudes of the somatosensory evoked potentials recorded during the nociceptive withdrawal reflex of patients with chronic pancreatitis (n = 10) and healthy controls (n = 18), **B**. Latencies of the somatosensory evoked potentials recorded during the nociceptive withdrawal reflex of patients with chronic pancreatitis (n = 10) and healthy controls (n = 18), **C**. Peak-to-peak amplitudes of the somatosensory evoked potentials recorded during the nociceptive withdrawal reflex of patients with chronic pancreatitis (n = 10) and healthy controls (n = 18)


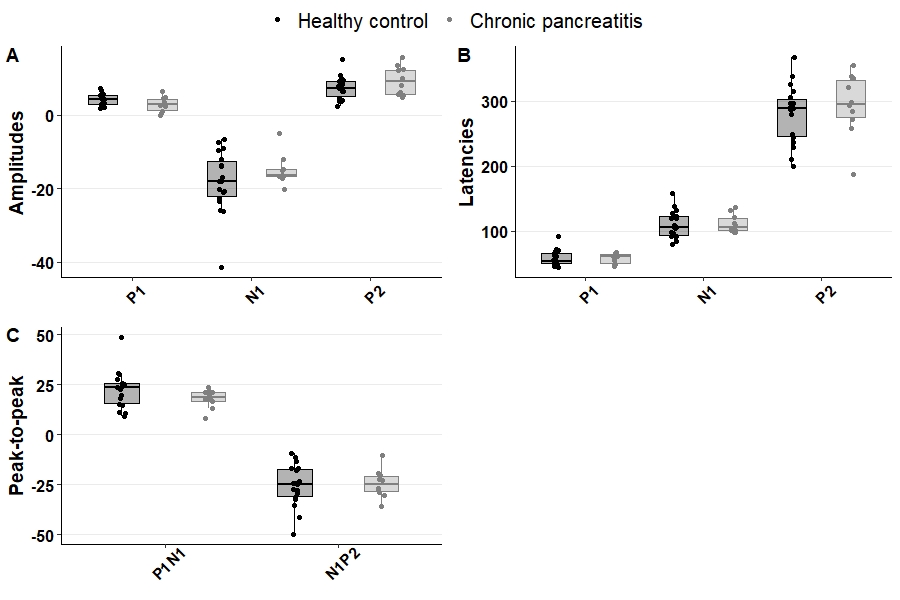

Supplement: Supplementary file 1 [file get_supplementary_file.php]
